# Supplementary material
Source: MDPI journal article supplement (https://www.mdpi.com/2225-1154/11/10/200)
Supplement: s1 [file s1 › climate-2584616-supplementary.pdf]

# Supplementary materials for the article “Machine learning for simulation of the urban heat island dynamics based on large-scale meteorological conditions”

Mikhail Varentsov<sup>1,2,\*</sup>, Mikhail Krinitskiy<sup>3,1</sup> and Victor Stepanenko<sup>1,2,4</sup>

<sup>1</sup> Research Computing Center, Lomonosov Moscow State University, 1/4 Leninskiye Gory, 119991 Moscow, Russia;

<sup>2</sup> Moscow Center for Fundamental and Applied Mathematics, 1 Leninskiye Gory, 119991 Moscow, Russia;

<sup>3</sup> Shirshov Institute of Oceanology, Russian Academy of Sciences, Moscow, Russia

<sup>4</sup> Faculty of Geography, Lomonosov Moscow State University, 1/4 Leninskiye Gory, 119991 Moscow, Russia;

\* Correspondence: mikhail.varentsov@srcc.msu.ru;

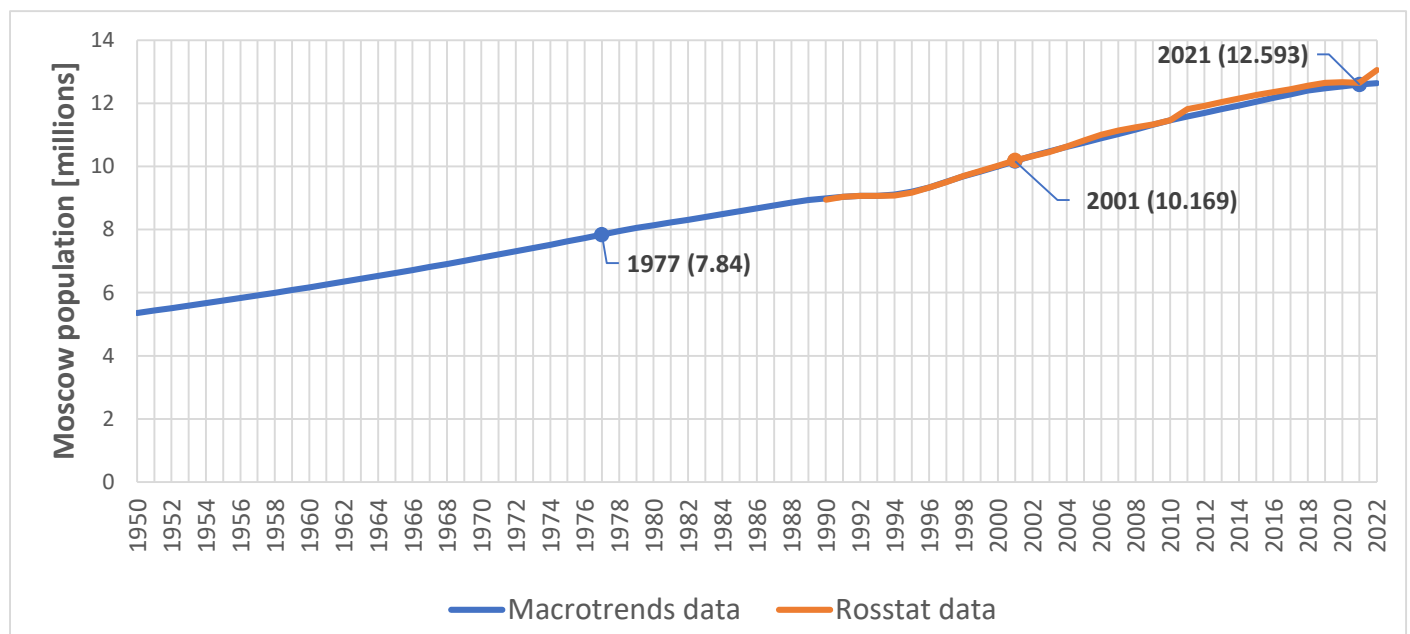

**Figure S1.** Recent changes in the population of the city of Moscow as an administrative unit according to open-access data from Rosstat, the Russian statistical agency (<https://rosstat.gov.ru/folder/12781>), which is available only since 1990, and according to open-access Macrotrends data (<https://www.macrotrends.net/cities/22299/moscow/population>), which is available for longer period.

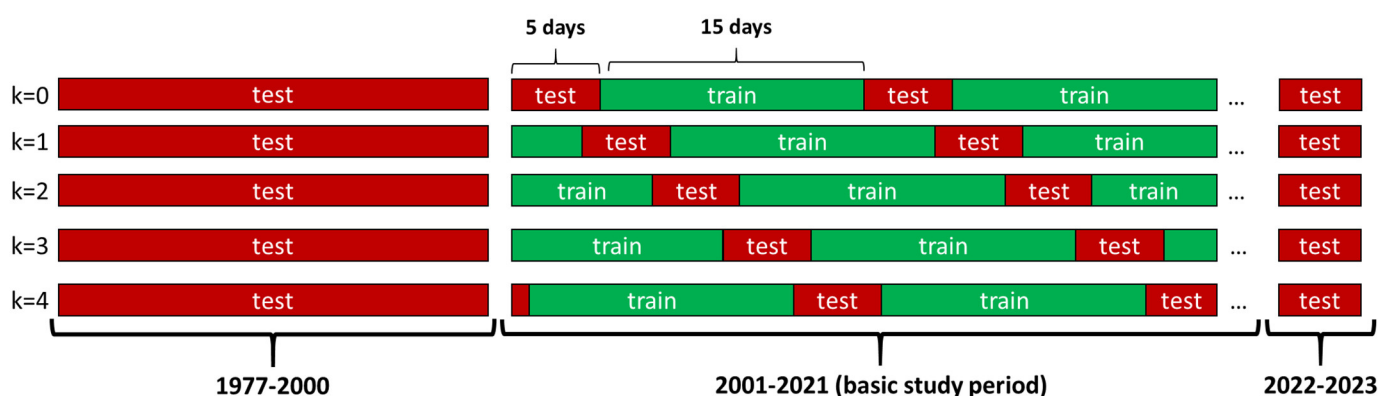

**Figure S2.** Scheme of the blocked k-fold method used to split the dataset into train and test subsets.

**Table S1.** Metrics of comparison between observation-based and reanalysis-based predictors: mean error of reanalysis with respect to observations (ME), root-mean square error (RMSE), ME and RMSE normalized by observed standard deviation (NME and NRMSE), correlation coefficient (R).

| Predictor | Unit | ME    | RMSE | NME   | NRMSE | R    |
|-----------|------|-------|------|-------|-------|------|
| t2m       |      | -0.28 | 0.84 | -0.03 | 0.08  | 1    |
| rh2m      |      | -0.52 | 4.55 | -0.03 | 0.28  | 0.96 |
| tcc       |      | 0.06  | 0.25 | 0.19  | 0.82  | 0.72 |
| lcc       |      | 0     | 0.31 | 0.01  | 0.86  | 0.69 |
| vel10m    |      | 1.23  | 1.48 | 0.92  | 1.1   | 0.86 |

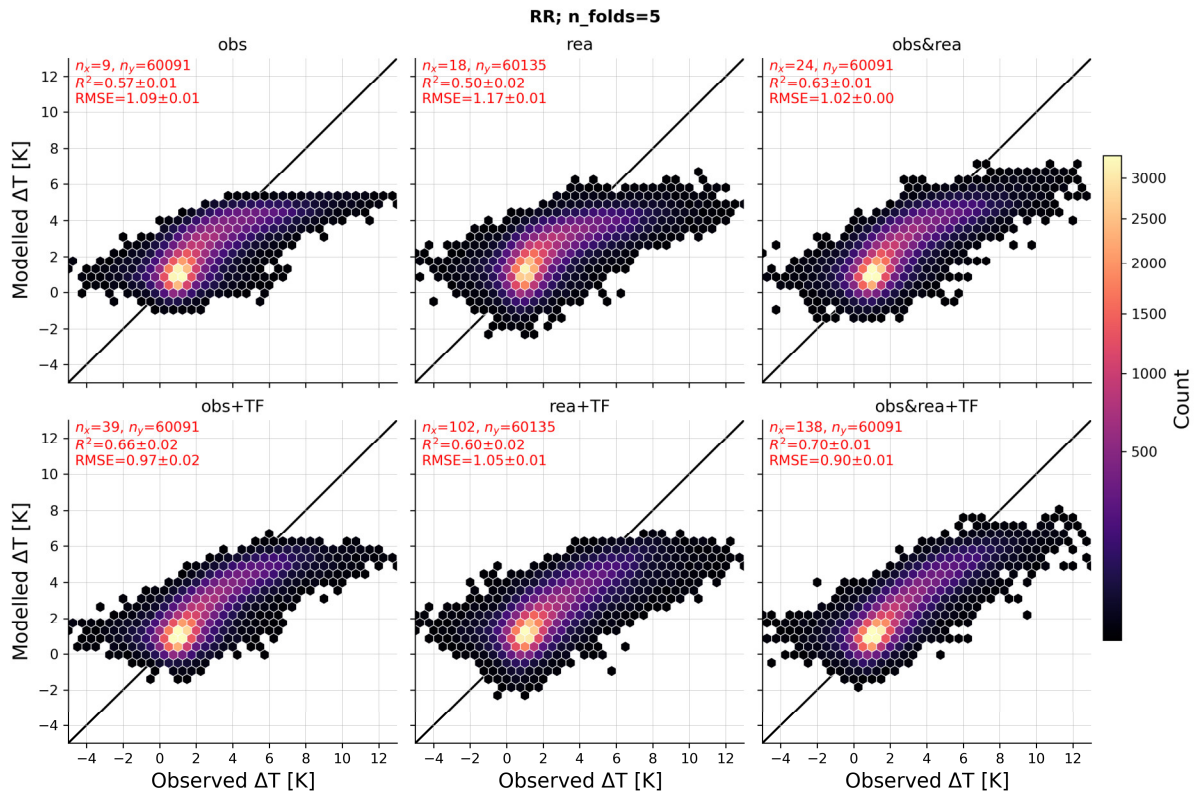

**Figure S3.** Hexbin plots showing comparison between observed and modelled UHI magnitude for the Ridge Regression (RR) baseline model; duplication of the Figure 2.

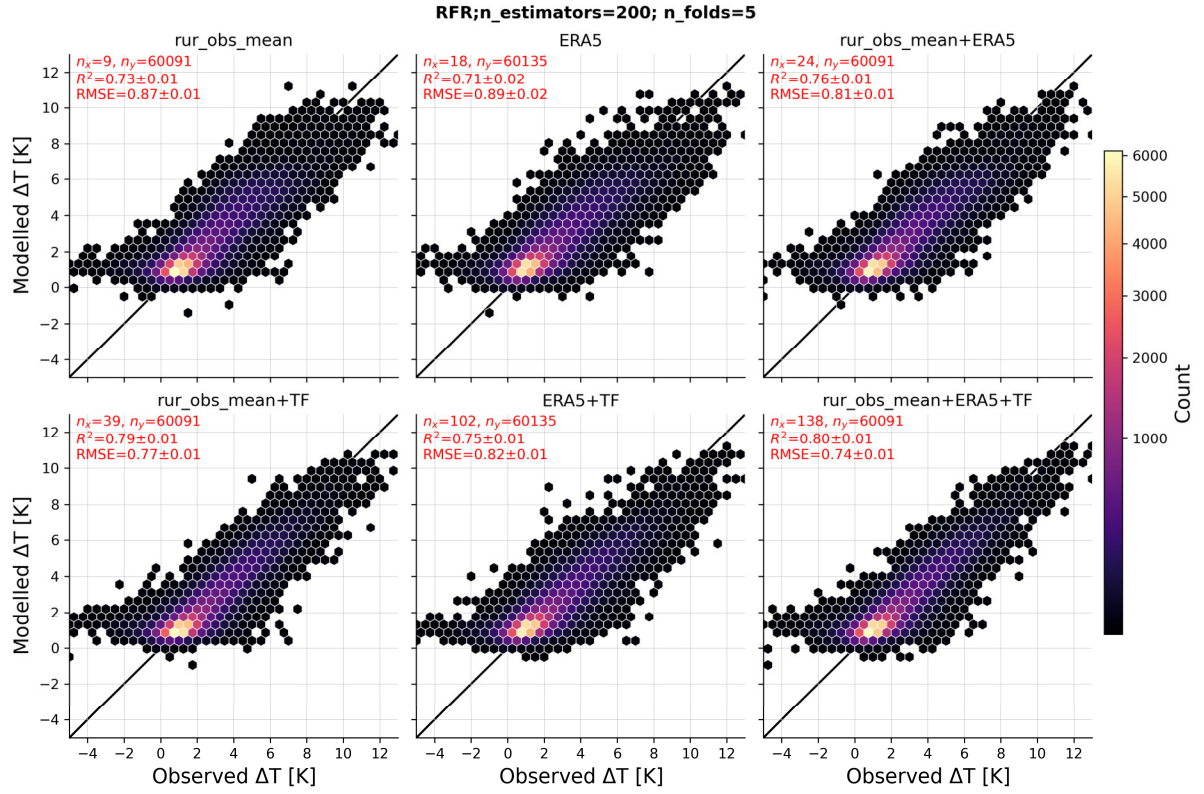

**Figure S4.** Same as Figure S3 for the most complex configuration of Random Forests Regression (RFR) model.

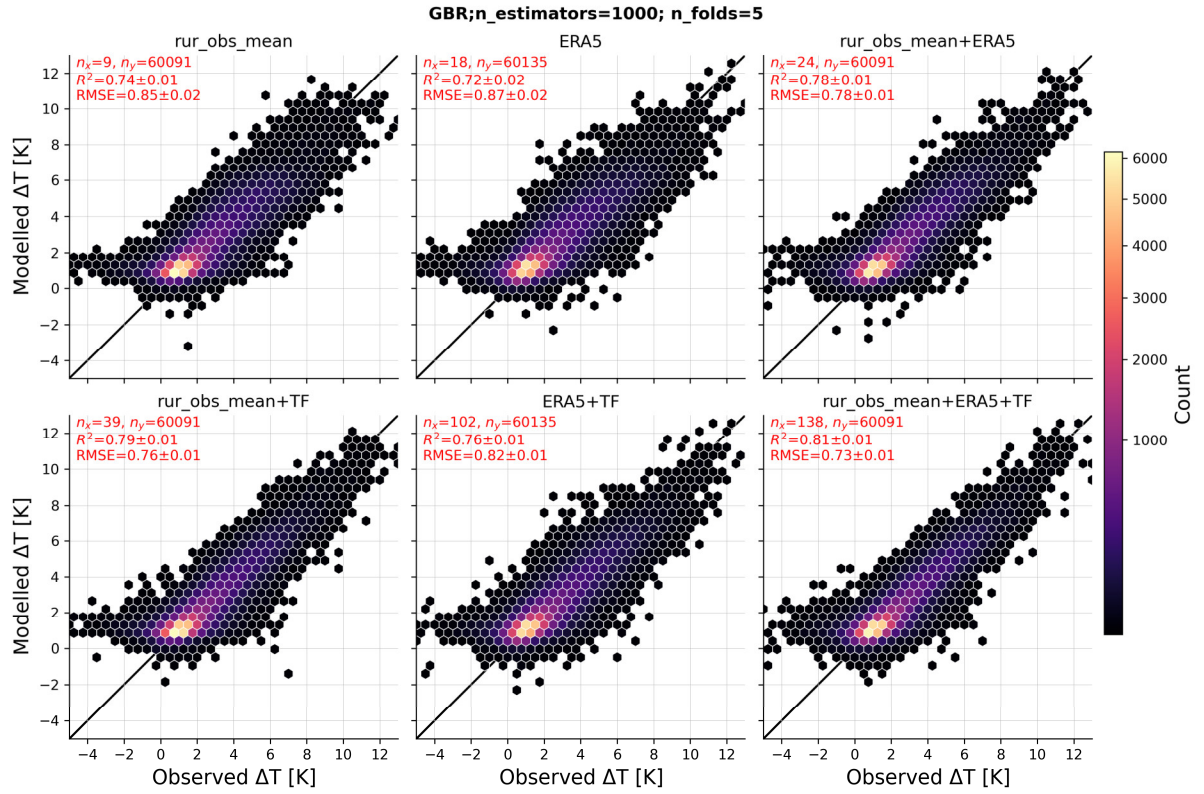

**Figure S5.** Same as Figure S3 for the most complex configuration of Gradient Boosting Regression (GBR) model.

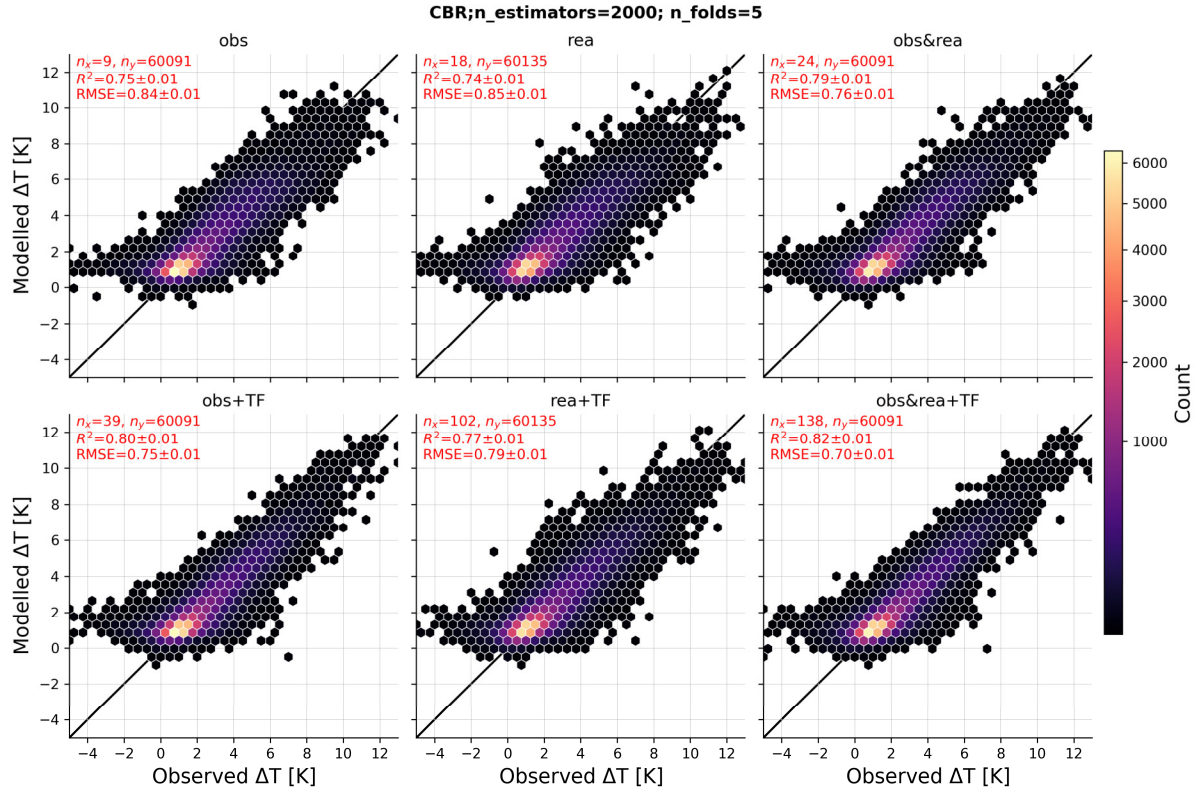

**Figure S6.** Same as Figure S3 for the most complex configuration of CatBoost Regression (CBR) model; duplication of the Figure 3.

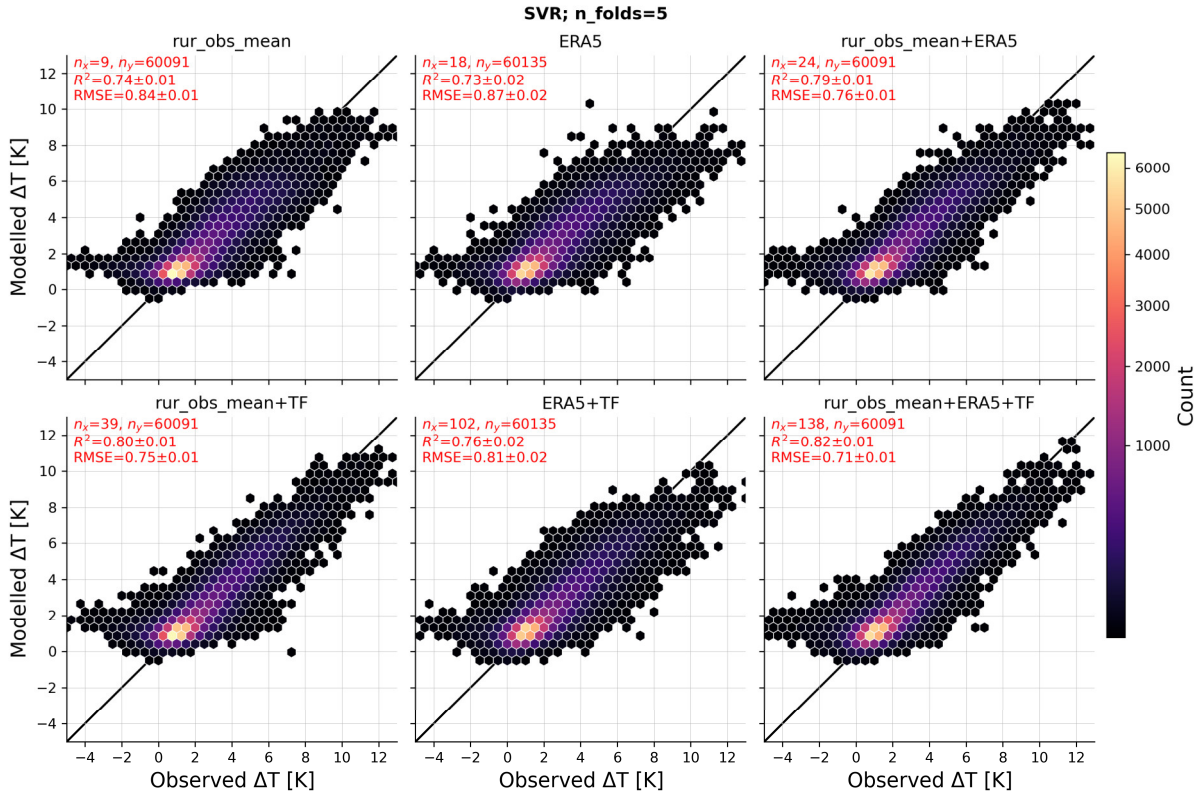

**Figure S7.** Same as Figure S3 for the Support Vector Regression (SVR) model.

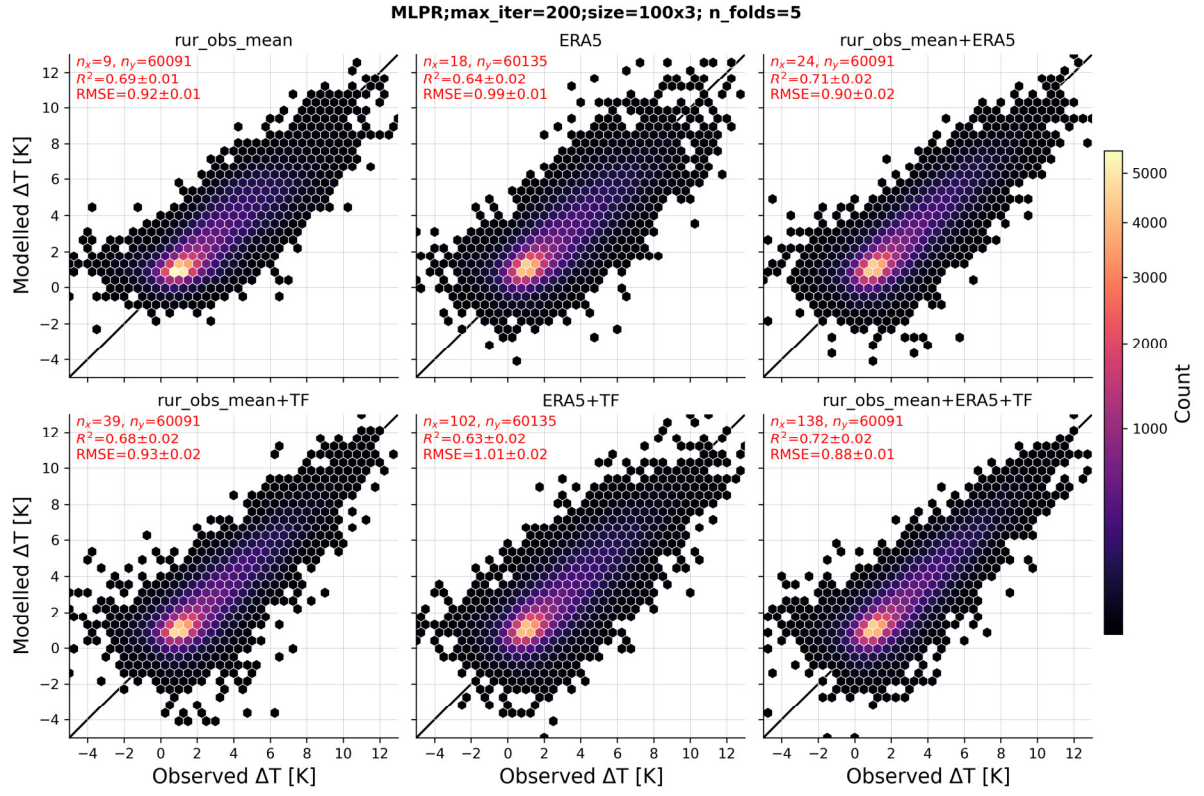

**Figure S8.** Same as Figure S3 for the least complex configuration of the Multi-Layer Perceptron Regression (MLPR) model.

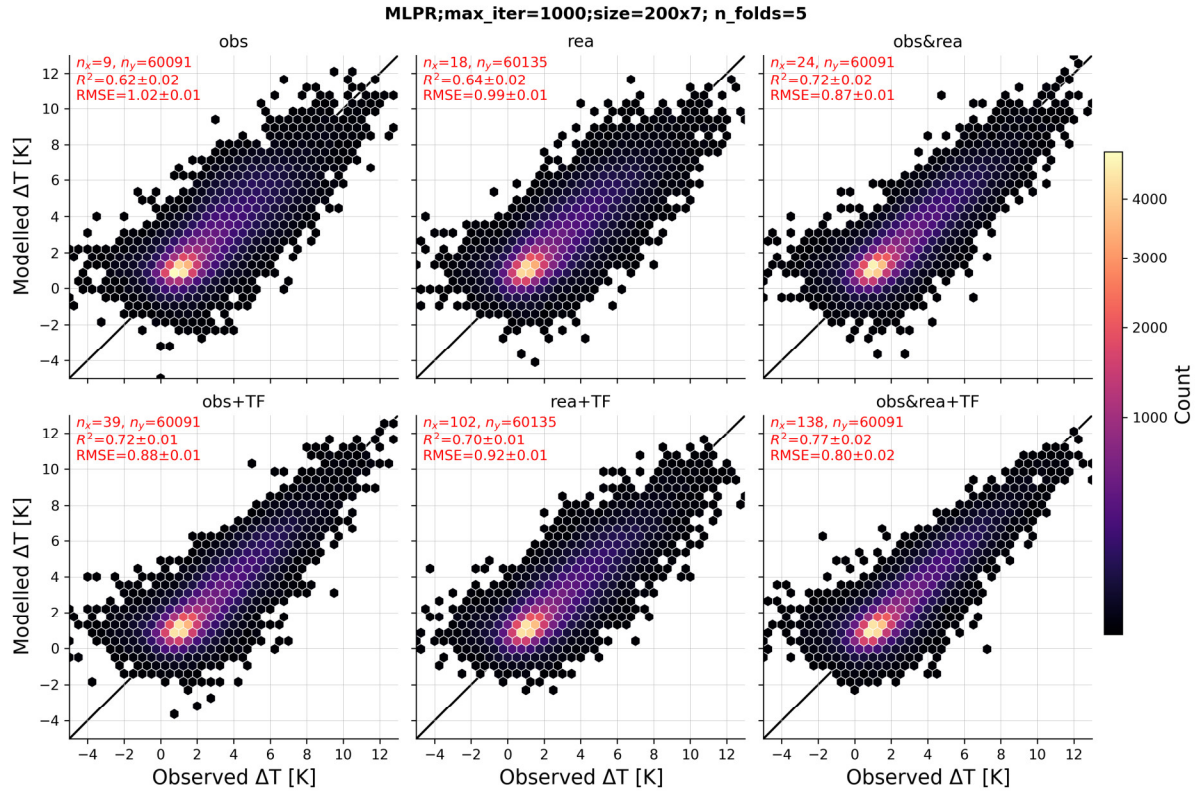

**Figure S9.** Same as Figure S3 for the most complex configuration of the Multi-Layer Perceptron Regression (MLPR) model; duplication of the Figure 4.
